# Supplementary material for: Macronutrient Intake in Pregnancy and Child Cognitive and Behavioural Outcomes
Source: MDPI journal article supplement (doi:10.3390/children8050425), 2021-05-20
Supplement: s1 [file s1]

## Supplementary Material

**Table S1.** Association of maternal dietary composition during pregnancy (not adjusted for energy intake) with child cognition outcomes up to age 4-years ( $n=58$ ).

| Variables <sup>1</sup>            | Beta-coefficient<br>t | 95% Confidence interval | P-value <sup>2</sup> | R-value     |
|-----------------------------------|-----------------------|-------------------------|----------------------|-------------|
| <b>Full scale IQ</b>              |                       |                         |                      |             |
| Energy                            | -1.12                 | -9.45 to 7.21           | 0.79                 | 0.15        |
| Protein (% E)                     | 6.85                  | -16.49 to 30.20         | 0.56                 | 0.15        |
| Total fat (% E)                   | 5.34                  | -13.82 to 24.49         | 0.58                 | 0.15        |
| PUFA (% E)                        | 0.32                  | -7.73 to 8.37           | 0.94                 | 0.15        |
| CHO (% E)                         | -12.65                | -35.10 to 9.80          | 0.26                 | 0.17        |
| P:C ratio                         | -0.83                 | -6.75 to 5.10           | 0.78                 | 0.15        |
| Protein (g)                       | -0.23                 | -8.20 to 7.74           | 0.95                 | 0.15        |
| PUFA (g)                          | -0.41                 | -6.49 to 5.66           | 0.89                 | 0.15        |
| Total sugars (g)                  | -0.27                 | -7.53 to 6.99           | 0.94                 | 0.15        |
| Starch (g)                        | -4.69                 | -12.42 to 3.04          | 0.23                 | 0.17        |
| <b>Verbal IQ</b>                  |                       |                         |                      |             |
| Energy                            | 1.28                  | -9.72 to 12.29          | 0.82                 | 0.04        |
| Protein (% E)                     | 0.49                  | -30.44 to 31.42         | 0.98                 | 0.04        |
| Total fat (% E)                   | 11.21                 | -13.88 to 36.30         | 0.38                 | 0.06        |
| PUFA (% E)                        | -0.40                 | -10.91 to 10.11         | 0.94                 | 0.04        |
| CHO (% E)                         | -13.10                | -42.79 to 16.59         | 0.38                 | 0.06        |
| P:C ratio                         | -2.87                 | -10.66 to 4.92          | 0.46                 | 0.05        |
| Protein (g)                       | 1.23                  | -9.29 to 11.75          | 0.82                 | 0.04        |
| PUFA (g)                          | 0.45                  | -7.53 to 8.42           | 0.91                 | 0.04        |
| Total sugars (g)                  | 1.32                  | -8.27 to 10.91          | 0.78                 | 0.04        |
| Starch (g)                        | -2.50                 | -12.81 to 7.81          | 0.63                 | 0.05        |
| <b>Performance IQ</b>             |                       |                         |                      |             |
| Energy                            | -4.52                 | -13.93 to 4.88          | 0.34                 | 0.20        |
| Protein (% E)                     | 14.96                 | -11.36 to 41.28         | 0.26                 | 0.20        |
| Total fat (% E)                   | 2.26                  | -19.60 to 24.10         | 0.84                 | 0.18        |
| PUFA (% E)                        | -1.82                 | -10.94 to 7.31          | 0.69                 | 0.18        |
| CHO (% E)                         | -14.59                | -40.13 to 10.96         | 0.26                 | 0.20        |
| P:C ratio                         | 1.21                  | -5.52 to 7.95           | 0.72                 | 0.18        |
| Protein (g)                       | -2.40                 | -11.43 to 6.64          | 0.60                 | 0.19        |
| PUFA (g)                          | -3.44                 | -10.29 to 3.41          | 0.32                 | 0.20        |
| Total sugars (g)                  | -2.98                 | -11.18 to 5.22          | 0.47                 | 0.19        |
| <b>Starch (g)</b>                 | <b>-8.06</b>          | <b>-16.70 to 0.57</b>   | <b>0.07</b>          | <b>0.23</b> |
| <b>Processing speed composite</b> |                       |                         |                      |             |
| Energy                            | -0.01                 | -9.06 to 9.03           | 0.99                 | 0.18        |
| Protein (% E)                     | 6.37                  | -16.25 to 28.99         | 0.57                 | 0.19        |

|                  |       |                 |      |      |
|------------------|-------|-----------------|------|------|
| Total fat (% E)  | 1.03  | -17.69 to 19.74 | 0.91 | 0.18 |
| PUFA (% E)       | -1.01 | -8.66 to 6.64   | 0.79 | 0.18 |
| CHO (% E)        | -8.33 | -30.26 to 13.61 | 0.45 | 0.19 |
| P:C ratio        | 3.60  | -2.01 to 9.21   | 0.20 | 0.21 |
| PUFA (g)         | -0.67 | -6.89 to 5.54   | 0.82 | 0.18 |
| Protein (g)      | 0.82  | -7.40 to 9.05   | 0.84 | 0.18 |
| Total sugars (g) | 0.50  | -6.89 to 7.89   | 0.89 | 0.18 |
| Starch (g)       | -3.78 | -12.99 to 5.43  | 0.41 | 0.19 |

**Table S1.** *(Continued)*

| Variable <sup>1</sup>             | Beta-coefficient<br>t | 95% Confidence interval | P-value <sup>2</sup> | R- value |
|-----------------------------------|-----------------------|-------------------------|----------------------|----------|
| <b>General language composite</b> |                       |                         |                      |          |
| Energy                            | 2.36                  | -10.55 to 15.26         | 0.72                 | 0.06     |
| Protein (%E)                      | 8.40                  | -27.84 to 44.63         | 0.64                 | 0.06     |
| Total fat (% E)                   | 14.82                 | -14.57 to 44.22         | 0.32                 | 0.07     |
| PUFA (% E)                        | 2.78                  | -9.54 to 15.10          | 0.65                 | 0.06     |
| CHO (% E)                         | -19.55                | -54.25 to 15.15         | 0.26                 | 0.08     |
| P:C ratio                         | -0.69                 | -9.88 to 8.49           | 0.88                 | 0.06     |
| Protein (g)                       | 3.13                  | -9.19 to 15.45          | 0.61                 | 0.06     |
| PUFA (g)                          | 2.84                  | -6.49 to 12.17          | 0.55                 | 0.06     |
| Total sugars (g)                  | 2.44                  | -8.80 to 13.68          | 0.67                 | 0.06     |
| Starch (g)                        | -3.62                 | -15.71 to 8.47          | 0.55                 | 0.06     |

CHO, carbohydrates, P:C, protein to carbohydrate, PUFA, polyunsaturated fatty acids, % E, percentage of energy.

Analysis models were adjusted for maternal age, education, pre-pregnancy BMI and birthweight. <sup>1</sup> The natural logarithm transformation of the nutrient variable was used for the linear regression models to meet normality assumptions. <sup>2</sup> P-values were derived by linear regression models.

**Table S2.** Association of maternal dietary composition during pregnancy (not adjusted for energy intake) with child behaviour outcomes up to age 4-years ( $n=51$ )

| Variables <sup>1</sup>                | Beta-coefficient<br>t | 95% Confidence interval | P-value <sup>2</sup> | R-value |
|---------------------------------------|-----------------------|-------------------------|----------------------|---------|
| <b>Total problems score</b>           |                       |                         |                      |         |
| Energy                                | 13.94                 | -11.82 to 39.70         | 0.28                 | 0.22    |
| Protein (% E)                         | 0.71                  | -72.44 to 73.87         | 0.98                 | 0.20    |
| PUFA (% E)                            | -13.21                | -40.05 to 13.64         | 0.33                 | 0.21    |
| Total fat (% E)                       | 3.36                  | -61.98 to 68.70         | 0.92                 | 0.20    |
| CHO (% E)                             | 14.06                 | -62.11 to 90.23         | 0.71                 | 0.21    |
| P:C ratio                             | 7.46                  | -11.49 to 26.42         | 0.43                 | 0.21    |
| Protein (g)                           | 12.65                 | -11.84 to 37.14         | 0.30                 | 0.21    |
| PUFA (g)                              | 0.94                  | -18.28 to 20.15         | 0.92                 | 0.20    |
| Total sugars (g)                      | 0.35                  | -19.27 to 53.27         | 0.35                 | 0.21    |
| Starch (g)                            | 9.62                  | -15.72 to 34.97         | 0.45                 | 0.21    |
| <b>Internalising broad band score</b> |                       |                         |                      |         |
| Energy                                | 3.12                  | -22.54 to 28.78         | 0.81                 | 0.27    |
| Protein (% E)                         | -6.20                 | -78.23 to 65.84         | 0.86                 | 0.27    |
| Total fat (% E)                       | 14.03                 | -50.20 to 78.27         | 0.66                 | 0.27    |
| PUFA (% E)                            | -13.55                | -39.96 to 12.87         | 0.31                 | 0.28    |
| CHO (% E)                             | 1.69                  | -73.42 to 76.82         | 0.96                 | 0.27    |
| P:C ratio                             | 9.23                  | -9.37 to 27.83          | 0.32                 | 0.28    |
| Protein (g)                           | 2.10                  | -22.27 to 26.48         | 0.86                 | 0.27    |
| PUFA (g)                              | -5.11                 | -23.98 to 13.76         | 0.59                 | 0.27    |
| Total sugars (g)                      | 5.52                  | -17.28 to 28.33         | 0.63                 | 0.27    |
| Starch (g)                            | 1.58                  | -23.52 to 26.69         | 0.90                 | 0.27    |

| <b>Externalising<br/>broad band score</b> |        |                 |      |      |
|-------------------------------------------|--------|-----------------|------|------|
| Energy                                    | 20.03  | -5.35 to 45.42  | 0.12 | 0.19 |
| Protein (% E)                             | 1.28   | -71.75 to 74.31 | 0.97 | 0.15 |
| Total fat (% E)                           | 14.04  | -51.07 to 79.15 | 0.67 | 0.15 |
| PUFA (% E)                                | -12.04 | -38.88 to 14.80 | 0.37 | 0.16 |
| CHO (% E)                                 | -2.44  | -79.96 to 75.07 | 0.95 | 0.10 |
| P:C ratio                                 | 5.83   | -13.14 to 24.80 | 0.54 | 0.15 |
| Protein (g)                               | 18.21  | -5.95 to 42.36  | 0.14 | 0.19 |
| PUFA (g)                                  | 4.83   | -14.30 to 23.96 | 0.61 | 0.15 |
| Total sugars (g)                          | 21.41  | -0.93 to 43.75  | 0.06 | 0.21 |
| Starch (g)                                | 13.75  | -11.39 to 38.89 | 0.28 | 0.17 |

CHO, carbohydrates, P:C, protein to carbohydrate, PUFA, polyunsaturated fatty acids, % E, percentage of energy.

Analysis models were adjusted for maternal age, education, pre-pregnancy BMI, birthweight and breastfeeding duration (weeks). <sup>1</sup> The natural logarithm transformation of the nutrient variable was used for the linear regression models to meet normality assumptions. <sup>2</sup> P-values were derived by linear regression models.

**Table S3.** Association of maternal dietary composition during pregnancy with child cognition outcomes up to age 4-years ( $n=58$ ) without adjustment for covariates

| Variables <sup>1</sup>            | Beta-coefficient | 95% Confidence interval | P-value <sup>2</sup> | R-value |
|-----------------------------------|------------------|-------------------------|----------------------|---------|
| <b>Full scale IQ</b>              |                  |                         |                      |         |
| Energy                            | -3.49            | -13.63 to 6.65          | 0.49                 | 0.01    |
| Protein (% E)                     | 6.23             | -17.52 to 29.98         | 0.60                 | 0.00    |
| Total fat (% E)                   | -0.01            | -21.96 to 21.92         | 1.00                 | 0.00    |
| PUFA (% E)                        | 0.32             | -8.08 to 8.72           | 0.94                 | 0.00    |
| CHO (% E)                         | -5.10            | -29.78 to 19.57         | 0.68                 | 0.00    |
| P:C ratio                         | -1.99            | -8.16 to 4.18           | 0.52                 | 0.01    |
| Protein (g)                       | -2.06            | -11.56 to 7.45          | 0.67                 | 0.00    |
| PUFA (g)                          | -1.49            | -8.63 to 5.65           | 0.68                 | 0.00    |
| Total sugars (g)                  | -0.48            | -8.44 to 7.49           | 0.91                 | 0.00    |
| Starch (g)                        | -6.47            | -15.61 to 2.67          | 0.16                 | 0.03    |
| <b>Verbal IQ</b>                  |                  |                         |                      |         |
| Energy                            | 1.81             | -10.73 to 14.35         | 0.77                 | 0.00    |
| Protein (% E)                     | 1.84             | -9.90 to 13.57          | 0.76                 | 0.00    |
| Total fat (% E)                   | 10.20            | -16.32 to 36.72         | 0.77                 | 0.01    |
| PUFA (% E)                        | 1.11             | -9.17 to 11.40          | 0.83                 | 0.00    |
| CHO (% E)                         | -11.00           | -41.04 to 19.02         | 0.47                 | 0.00    |
| P:C ratio                         | -2.73            | -10.34 to 4.88          | 0.48                 | 0.01    |
| Protein (g)                       | 1.84             | -9.90 to 13.57          | 0.76                 | 0.00    |
| PUFA (g)                          | 1.71             | -7.08 to 10.50          | 0.70                 | 0.00    |
| Total sugars (g)                  | 2.05             | -7.77 to 11.87          | 0.68                 | 0.00    |
| Starch (g)                        | -2.98            | -14.43 to 8.47          | 0.60                 | 0.00    |
| <b>Performance IQ</b>             |                  |                         |                      |         |
| Energy                            | -7.22            | -18.82 to 4.39          | 0.22                 | 0.03    |
| Protein (% E)                     | 9.12             | -18.27 to 36.51         | 0.51                 | 0.01    |
| Total fat (% E)                   | -1.14            | -26.43 to 24.15         | 0.93                 | 0.00    |
| PUFA (% E)                        | -2.86            | -12.50 to 6.77          | 0.55                 | 0.01    |
| CHO (% E)                         | -6.82            | -35.28 to 21.64         | 0.63                 | 0.00    |
| P:C ratio                         | -1.16            | -8.31 to 5.98           | 0.75                 | 0.00    |
| Protein (g)                       | -4.85            | -15.80 to 6.07          | 0.38                 | 0.01    |
| PUFA (g)                          | -5.62            | -13.73 to 2.48          | 0.17                 | 0.03    |
| Total sugars (g)                  | -3.55            | -12.71 to 5.60          | 0.44                 | 0.01    |
| Starch (g)                        | -9.06            | -19.49 to 1.38          | 0.09                 | 0.05    |
| <b>Processing speed composite</b> |                  |                         |                      |         |
| Energy                            | -0.17            | -11.30 to 10.95         | 0.98                 | 0.00    |
| Protein (% E)                     | 6.26             | -17.74 to 30.26         | 0.60                 | 0.00    |
| Total fat (% E)                   | -3.63            | -25.45 to 18.19         | 0.74                 | 0.00    |
| PUFA (% E)                        | -0.62            | -7.95 to 6.71           | 0.87                 | 0.00    |

| CHO (% E)                         | -2.96                   | -27.33 to 21.40                | 0.81                       | 0.00            |
|-----------------------------------|-------------------------|--------------------------------|----------------------------|-----------------|
| P:C ratio                         | 1.47                    | -4.57 to 7.50                  | 0.63                       | 0.00            |
| PUFA (g)                          | -0.62                   | -7.95 to 6.71                  | 0.87                       | 0.00            |
| Protein (g)                       | 0.87                    | -8.77 to 10.51                 | 0.86                       | 0.00            |
| Total sugars (g)                  | 0.91                    | -7.05 to 8.86                  | 0.82                       | 0.00            |
| Starch (g)                        | 5.66                    | -14.88 to 7.83                 | 0.54                       | 0.01            |
| <b>Table S3. (Continued)</b>      |                         |                                |                            |                 |
| <b>Variable<sup>1</sup></b>       | <b>Beta-coefficient</b> | <b>95% Confidence interval</b> | <b>P-value<sup>2</sup></b> | <b>R- value</b> |
| <b>General language composite</b> |                         |                                |                            |                 |
| <b>Energy</b>                     | 0.78                    | -13.78 to 15.34                | 0.92                       | 0.00            |
| <b>Protein (%E)</b>               | 10.48                   | -23.49 to 44.47                | 0.54                       | 0.00            |
| <b>Total fat (% E)</b>            | 8.45                    | -22.41 to 39.30                | 0.59                       | 0.00            |
| <b>PUFA (% E)</b>                 | 4.19                    | -7.70 to 16.08                 | 0.48                       | 0.00            |
| <b>CHO (% E)</b>                  | -12.59                  | -47.45 to 22.26                | 0.47                       | 0.01            |
| <b>P:C ratio</b>                  | -1.29                   | -10.15 to 7.58                 | 0.78                       | 0.00            |
| <b>Protein (g)</b>                | 2.36                    | -11.25 to 15.97                | 0.73                       | 0.00            |
| <b>PUFA (g)</b>                   | 3.45                    | -6.73 to 13.62                 | 0.50                       | 0.00            |
| <b>Total sugars (g)</b>           | 2.98                    | -8.41 to 14.37                 | 0.60                       | 0.00            |
| <b>Starch (g)</b>                 | -6.72                   | -19.92 to 6.48                 | 0.31                       | 0.00            |

CHO, carbohydrates, P:C, protein to carbohydrate, PUFA, polyunsaturated fatty acids, % E, percentage of energy.

Analysis models were adjusted for maternal age, education, pre-pregnancy BMI and birthweight. <sup>1</sup> The natural logarithm transformation of the nutrient variable was used for the linear regression models to meet normality assumptions. <sup>2</sup> P-values were derived by linear regression models.

**Table S4.** Association of maternal dietary composition during pregnancy with child behaviour outcomes up to age 4-years ( $n=51$ ) without adjustment for covariates

| <b>Variables<sup>1</sup></b>          | <b>Beta-coefficient<br/>t</b> | <b>95% Confidence<br/>interval</b> | <b>P-value<sup>2</sup></b> | <b>R-value</b> |
|---------------------------------------|-------------------------------|------------------------------------|----------------------------|----------------|
| <b>Total problems score</b>           |                               |                                    |                            |                |
| Energy                                | 20.86                         | -10.58 to 52.31                    | 0.19                       | 0.03           |
| Protein (% E)                         | -23.42                        | -95.72 to 48.87                    | 0.52                       | 0.01           |
| PUFA (% E)                            | -15.24                        | -42.48 to 12.01                    | 0.27                       | 0.02           |
| Total fat (% E)                       | 31.91                         | -41.01 to 104.83                   | 0.38                       | 0.02           |
| CHO (% E)                             | -2.01                         | -86.73 to 82.71                    | 0.96                       | 0.00           |
| P:C ratio                             | 2.91                          | -17.15 to 22.97                    | 0.77                       | 0.00           |
| Protein (g)                           | 13.95                         | -15.37 to 43.27                    | 0.34                       | 0.02           |
| PUFA (g)                              | 0.18                          | -22.23 to 22.58                    | 0.99                       | 0.00           |
| Total sugars (g)                      | 16.41                         | -8.26 to 41.09                     | 0.19                       | 0.03           |
| Starch (g)                            | 16.87                         | -14.33 to 48.07                    | 0.28                       | 0.02           |
| <b>Internalising broad band score</b> |                               |                                    |                            |                |
| Energy                                | 5.50                          | -26.67 to 37.68                    | 0.73                       | 0.00           |
| Protein (% E)                         | -37.40                        | -109.71 to 34.91                   | 0.30                       | 0.02           |
| Total fat (% E)                       | -12.17                        | -39.72 to 15.38                    | 0.40                       | 0.02           |
| PUFA (% E)                            | 43.58                         | -29.35 to 116.51                   | 0.24                       | 0.03           |
| CHO (% E)                             | -12.86                        | -98.07 to 72.35                    | 0.76                       | 0.00           |
| P:C ratio                             | 2.31                          | -17.88 to 22.51                    | 0.82                       | 0.00           |
| Protein (g)                           | 10.32                         | -31.29 to 28.28                    | 0.92                       | 0.00           |
| PUFA (g)                              | 11.20                         | -27.83 to 17.17                    | 0.64                       | 0.00           |
| Total sugars (g)                      | 3.56                          | -21.70 to 28.82                    | 0.78                       | 0.00           |
| Starch (g)                            | 4.91                          | -26.83 to 36.66                    | 0.76                       | 0.00           |

|                                           |        |                  |      |      |
|-------------------------------------------|--------|------------------|------|------|
| <b>Externalising<br/>broad band score</b> |        |                  |      |      |
| Energy                                    | 28.23  | -2.30 to 58.76   | 0.07 | 0.06 |
| Protein (% E)                             | -15.05 | -86.55 to 56.45  | 0.67 | 0.00 |
| Total fat (% E)                           | 32.06  | -39.86 to 103.99 | 0.38 | 0.02 |
| PUFA (% E)                                | -17.72 | -44.46 to 9.03   | 0.19 | 0.19 |
| CHO (% E)                                 | -7.26  | -90.83 to 76.30  | 0.87 | 0.00 |
| P:C ratio                                 | 2.17   | -17.62 to 21.97  | 0.83 | 0.00 |
| Protein (g)                               | 21.64  | -6.90 to 50.18   | 0.13 | 0.04 |
| PUFA (g)                                  | -17.72 | -44.46 to 9.03   | 0.19 | 0.03 |
| Total sugars (g)                          | 20.77  | -3.29 to 44.84   | 0.09 | 0.06 |
| Starch (g)                                | 21.95  | -8.56 to 52.46   | 0.16 | 0.04 |

CHO, carbohydrates, P:C, protein to carbohydrate, PUFA, polyunsaturated fatty acids, % E, percentage of energy.

Analysis models were adjusted for maternal age, education, pre-pregnancy BMI, birthweight and breastfeeding duration (weeks). <sup>1</sup> The natural logarithm transformation of the nutrient variable was used for the linear regression models to meet normality assumptions. <sup>2</sup> P-values were derived by linear regression models.
